# Supplementary material
Source: Elsevier journal article supplement (https://comptes-rendus.academie-sciences.fr/geoscience/article/10.1016/j.crte.2007.03.006/file/attach/mmc1.pdf)
Supplement: mmc1 [file mmc1.pdf]

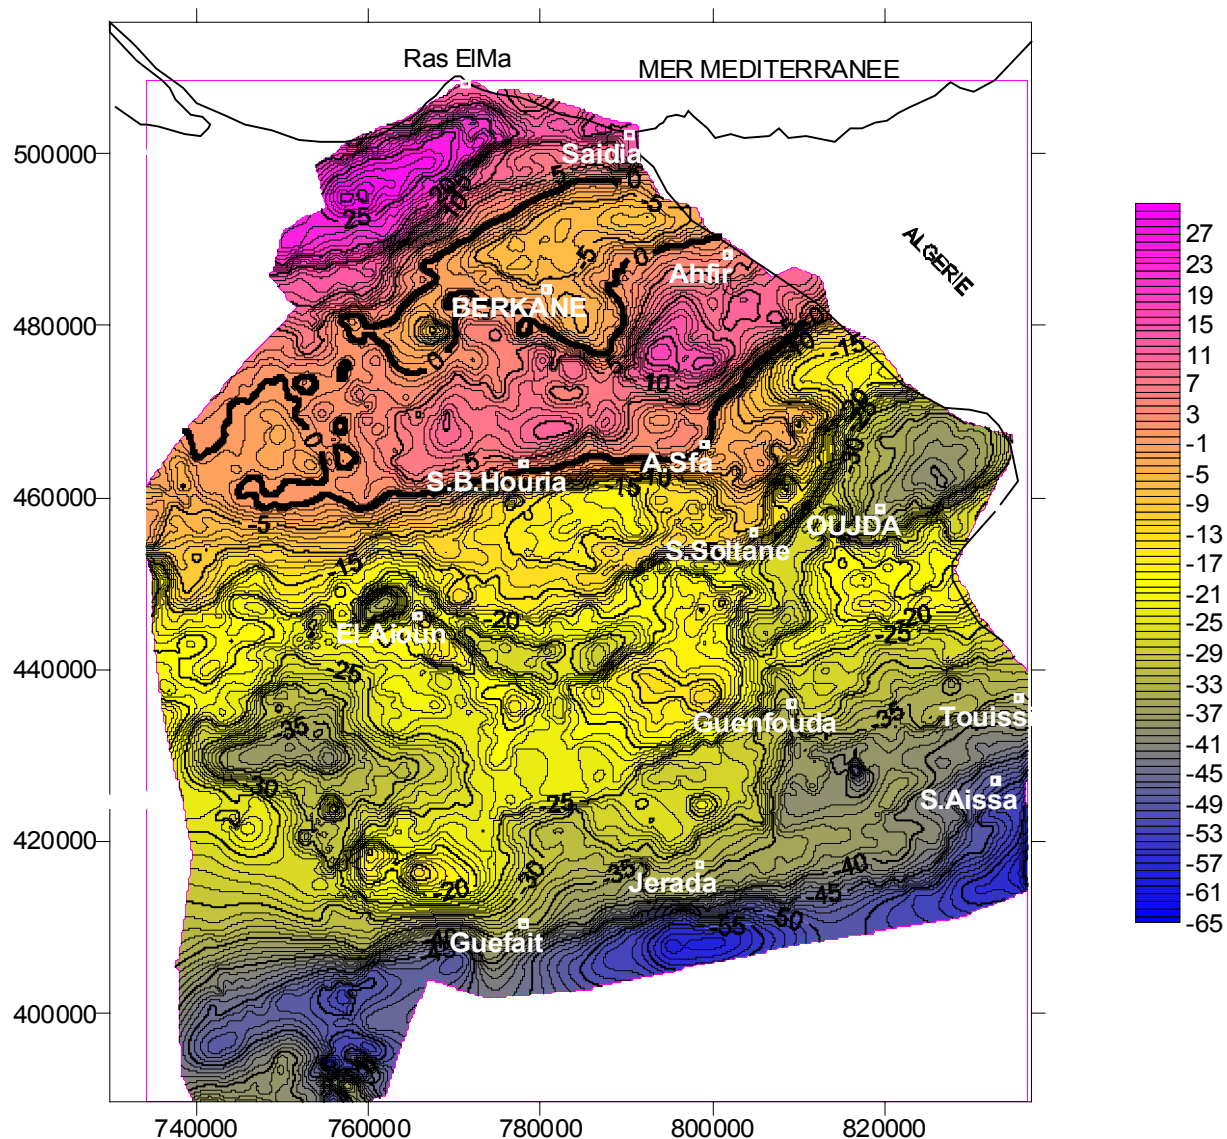

Fig.2 Carte d'anomalie de Bouguer (densité de correction :  $2.2 \text{ g/cm}^3$ , intervalle=1mgal).  
 Fig.2 Bouguer anomaly map (reduction density:  $2.2\text{g/cm}^3$ , interval = 1mgal).
